# Supplementary material
Source: PubMed Central journal article supplement (PMC5438766)
Supplement: NIHMS836460-supplement-13361_2016_1542_MOESM1_ESM.pdf [file NIHMS836460-supplement-13361_2016_1542_MOESM1_ESM.pdf]

# **Characterization of Lipid A Variants by Energy-Resolved Mass Spectrometry: Impact of Acyl Chains**

Christopher M. Crittenden,<sup>1</sup> Lucas D. Akin,<sup>1</sup> Lindsay J. Morrison,<sup>1</sup> M. Stephen Trent,<sup>2</sup>  
Jennifer S. Brodbelt<sup>1</sup>

<sup>1</sup>Department of Chemistry, University of Texas, Austin, TX 78712

<sup>2</sup>Department of Infectious Diseases, University of Georgia, Athens, Georgia 30602,  
United States

**Supporting Information**

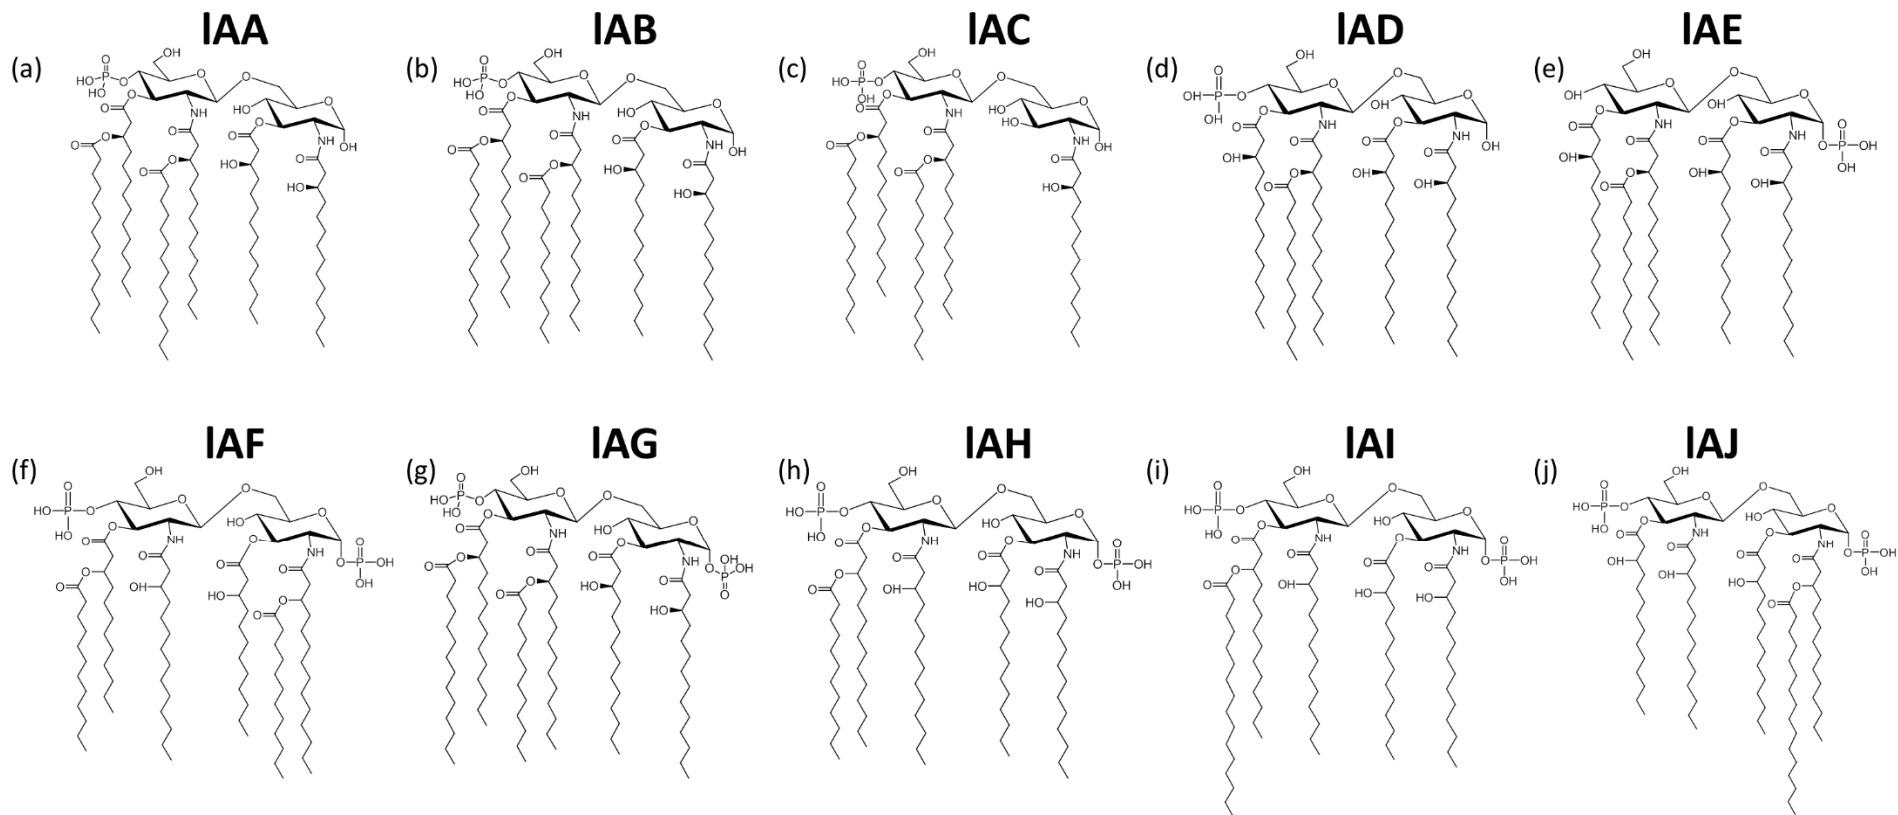

**Supplementary Figure S1:** All 10 lipid A variants evaluated. (a) monophosphoryl lipid A (1745.28 Da, IAA); (b) detoxified lipid A (1717.25 Da, IAB); (c) monophosphoryl 3-deacyl lipid A (1519.09 Da, IAC); (d) *E. coli* strain BN2E (1507.05 Da, IAD); (e) *E. coli* strain BN2F (1507.05 Da, IAE); (f) *Acinetobacter baumannii* expressing lpxL (1713.13 Da, IAF); (g) bisphosphorylated lipid A (1797.22 Da; IAG); (h) *W. succinogenes* lpxJ (1587.02 Da, IAH); (i) *C. jejuni* 240 0482 (1643.08 Da, IAI); (j) *C. jejuni* lpxJ (1643.08 Da, IAJ)

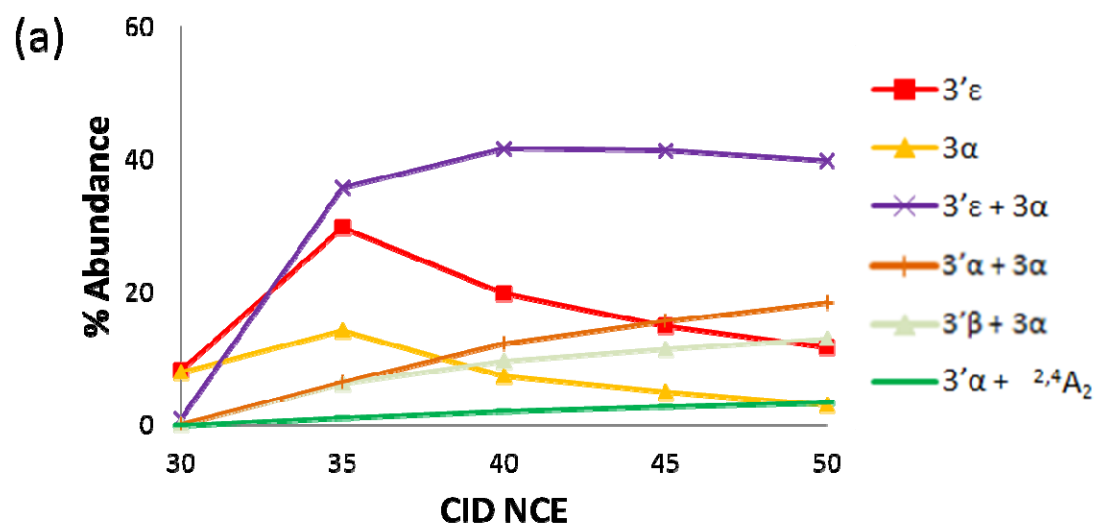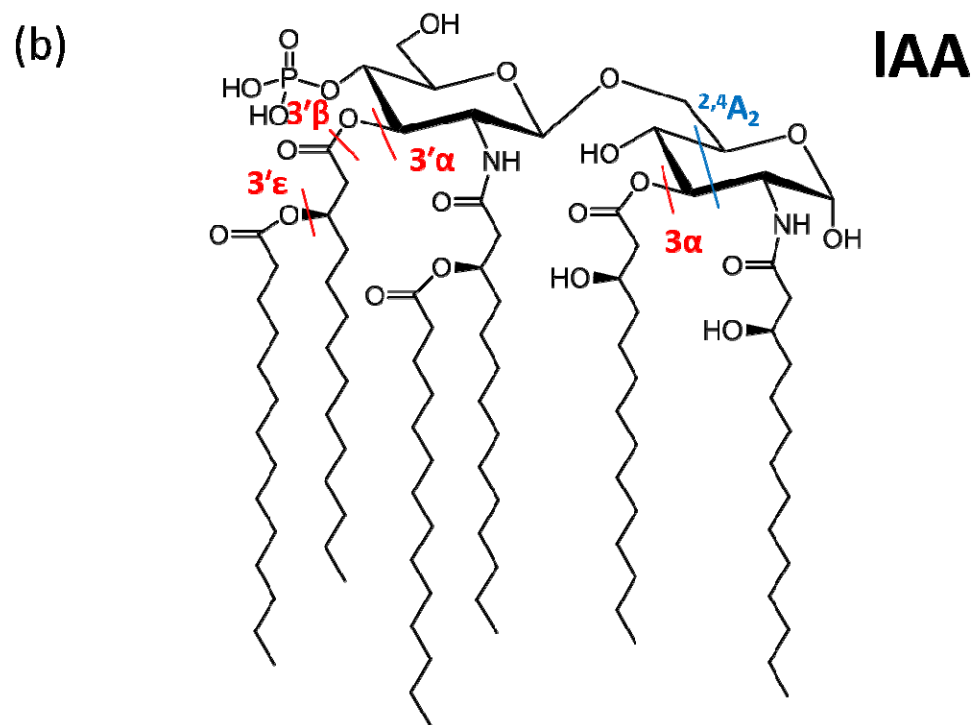

**Supplementary Figure S2:** (a) CID ERMS of IAA and (b) the structure. CID ERMS does not afford the same genealogical information that HCD and UVPD do.

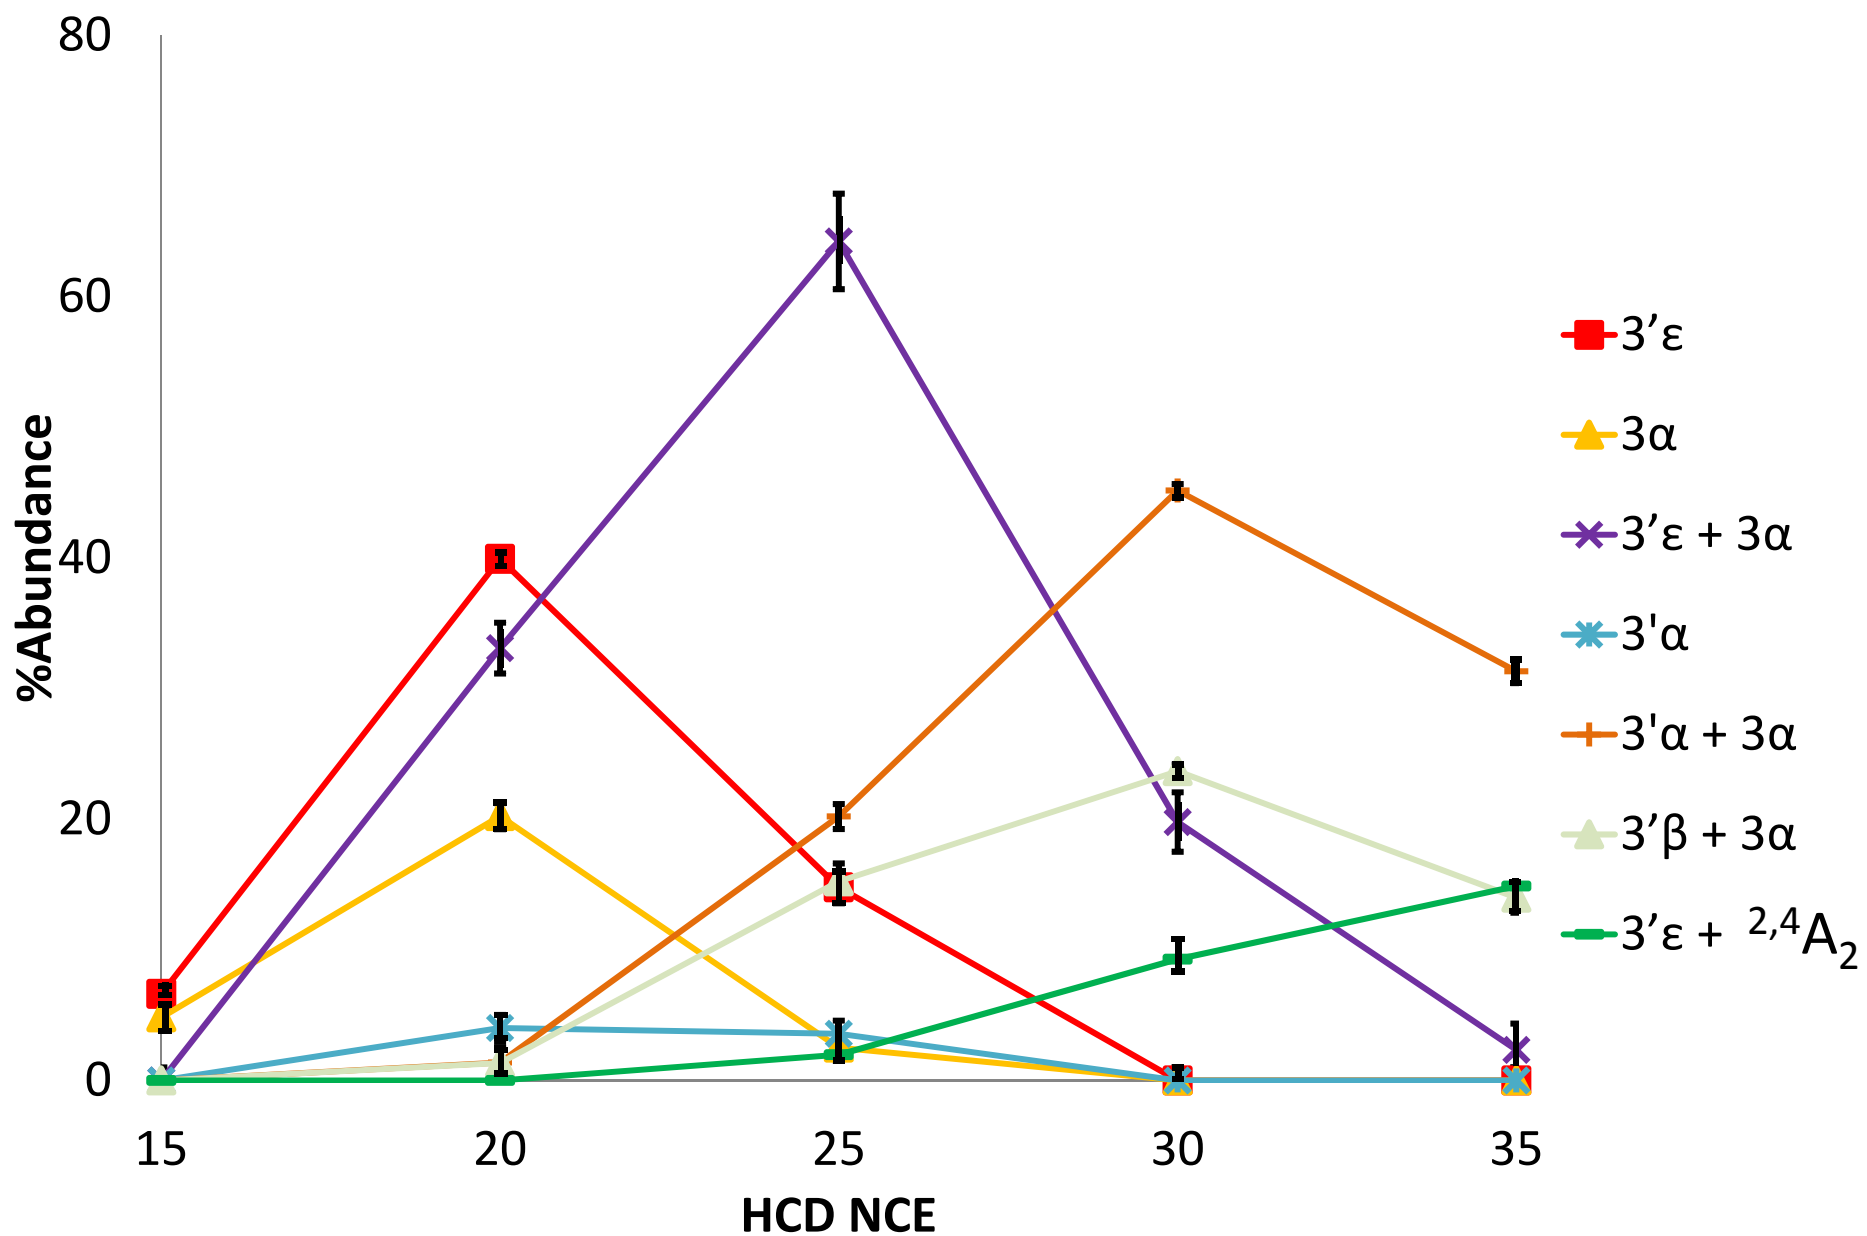

**Supplementary Figure S3:** HCD ERMS plot of IAA with error bars illustrating the standard deviations of the measurements performed in triplicate.

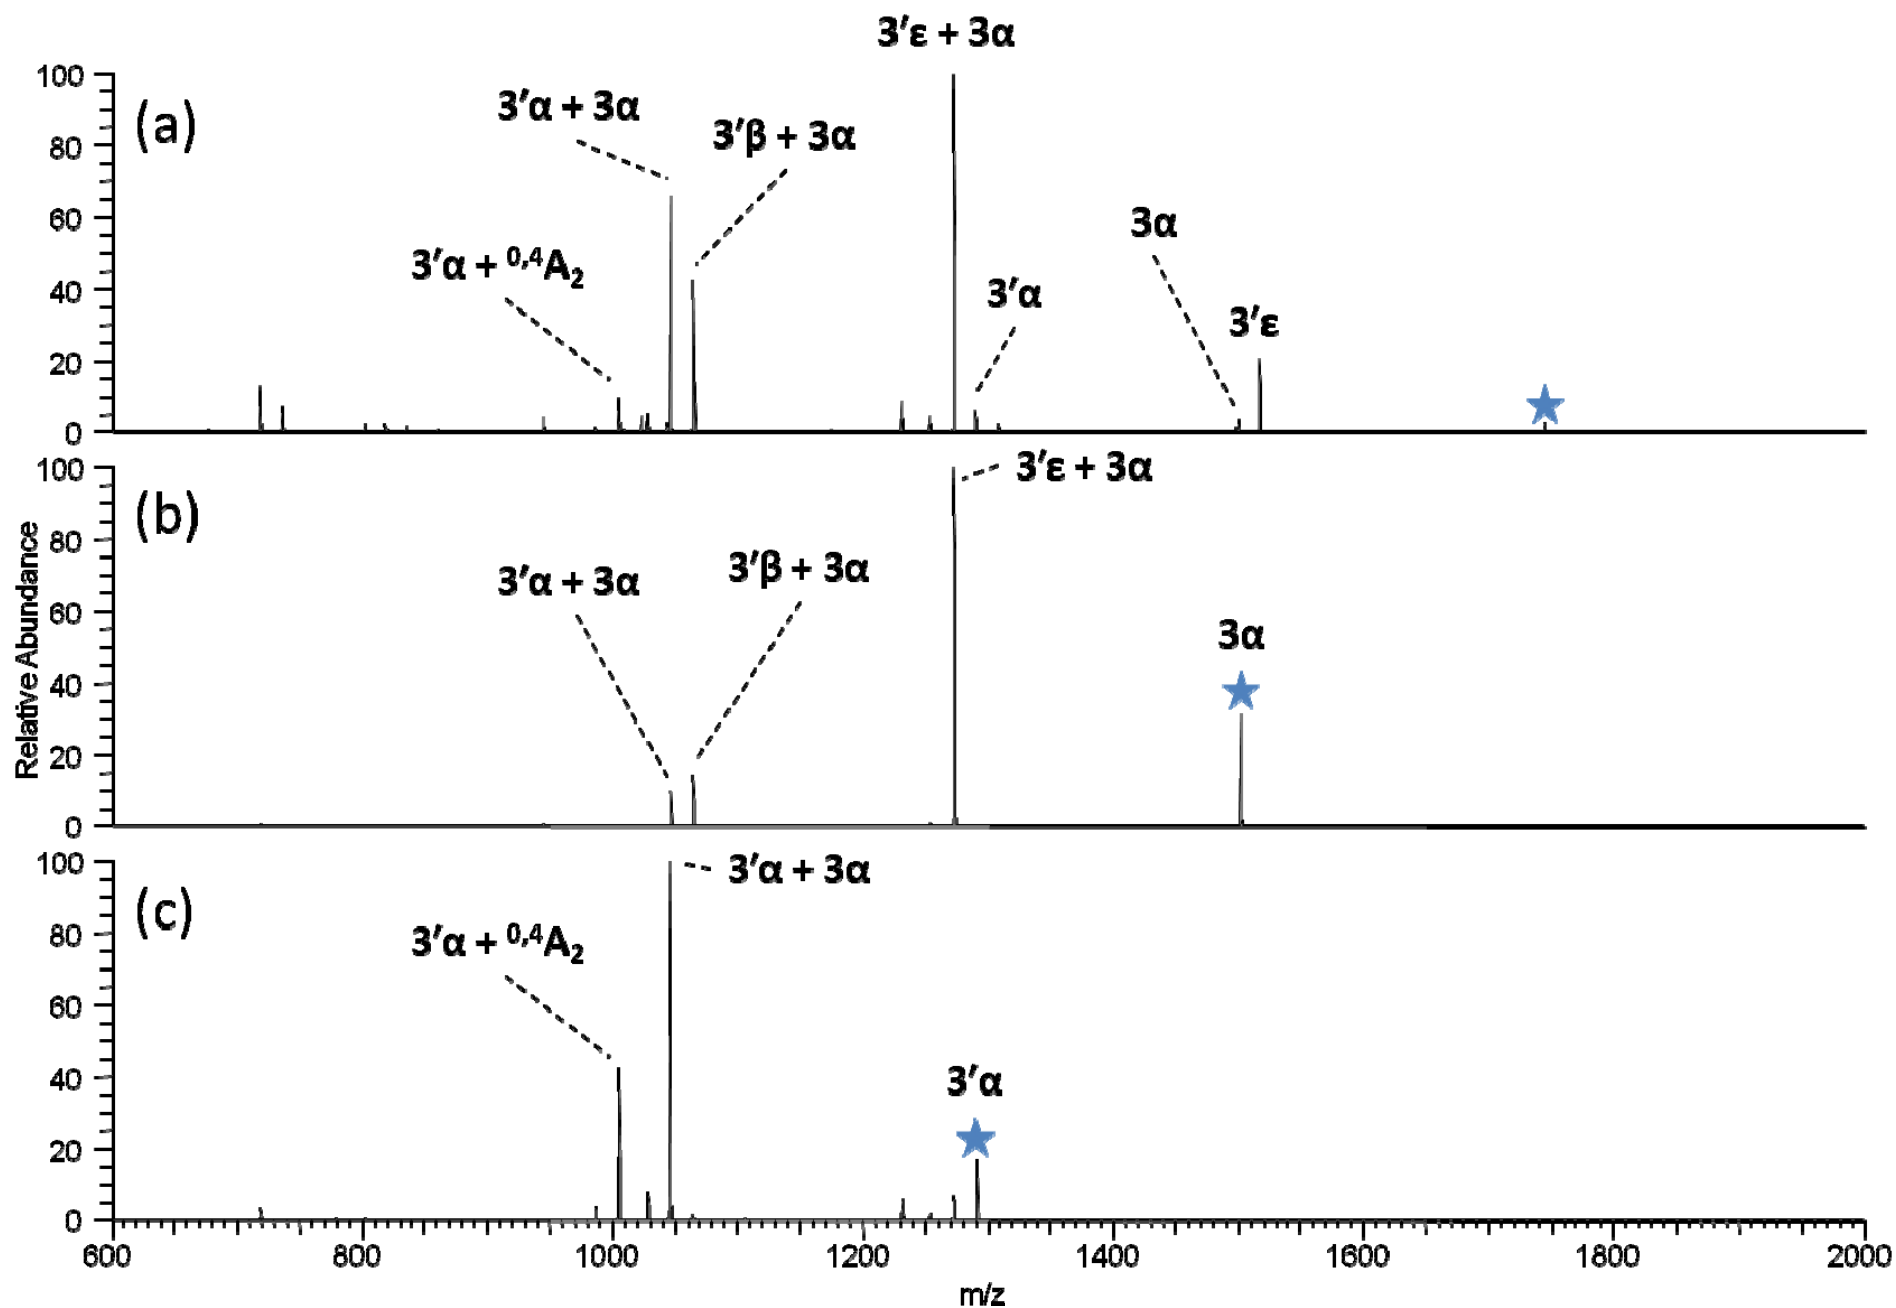

**Supplementary Figure S4:** (a) MS2 (HCD) on the 1- charge state of IAA. (b) MS3 (HCD) on the  $3\alpha$  peak reveals the procedural loss of the  $3'\epsilon$ ,  $3'\beta$ , and  $3'\alpha$ , respectively. (c) MS3 (HCD) on the  $3'\alpha$  peak reveals loss of  $3\alpha$  and cross-ring cleavage at  ${}^0,4A_2$ .

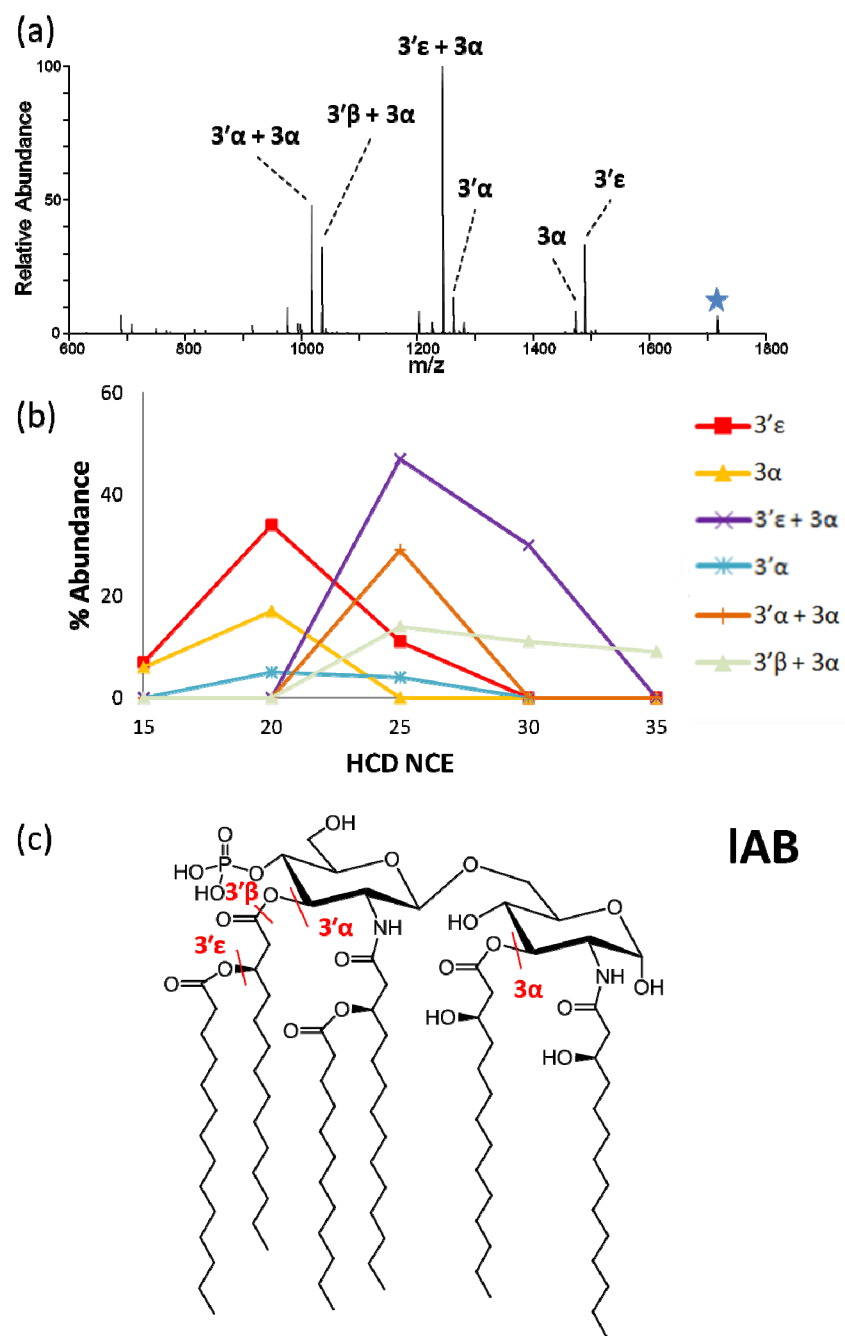

**Supplementary Figure S5:** IAB MS2 spectra using HCD at NCE=25 (a) and the corresponding HCD ERMS plot (b). The structure of IAB is shown in (c).

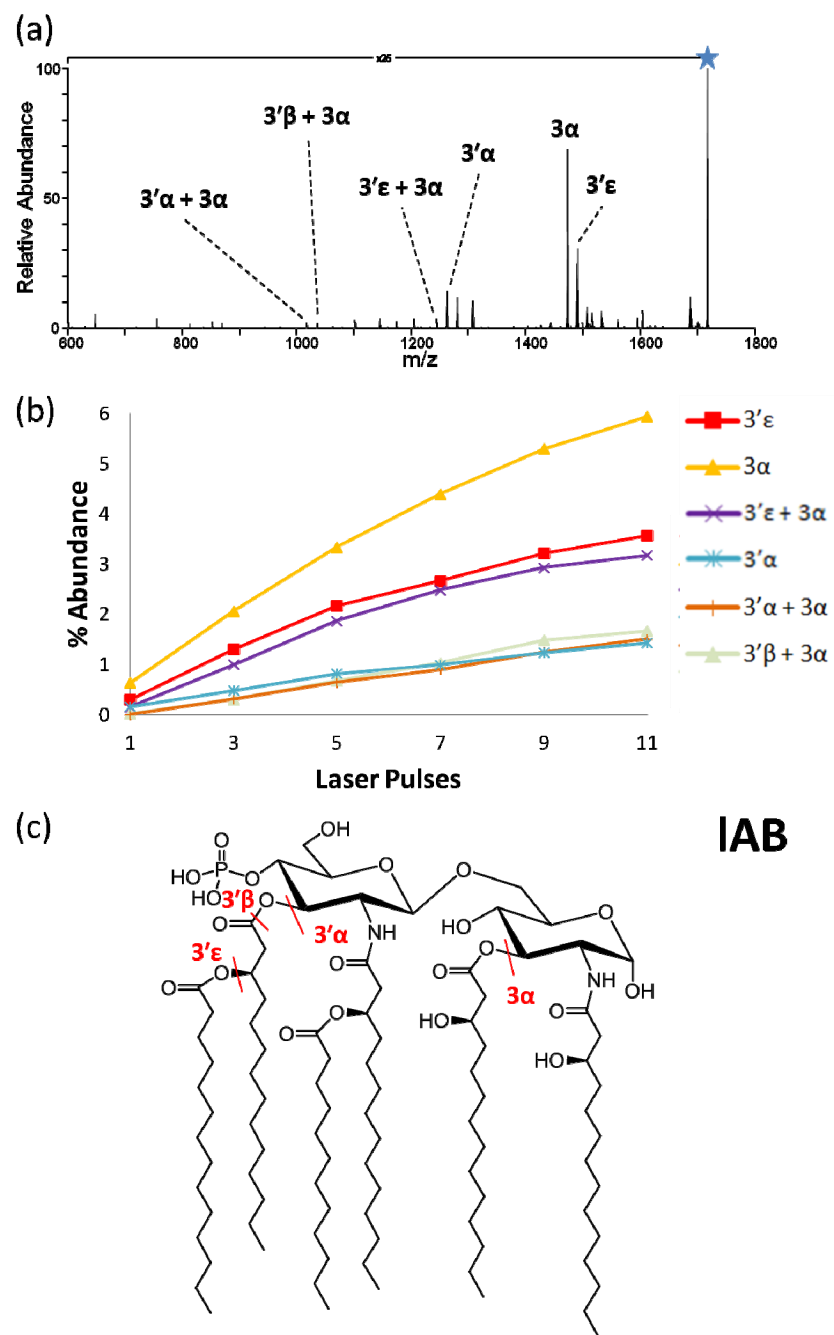

**Supplementary Figure S6:** IAB MS2 spectra using UVPD at 3mJ, 5 pulses (a) and the corresponding UVPD ERMS plot (b). The structure for IAB is shown in (c).

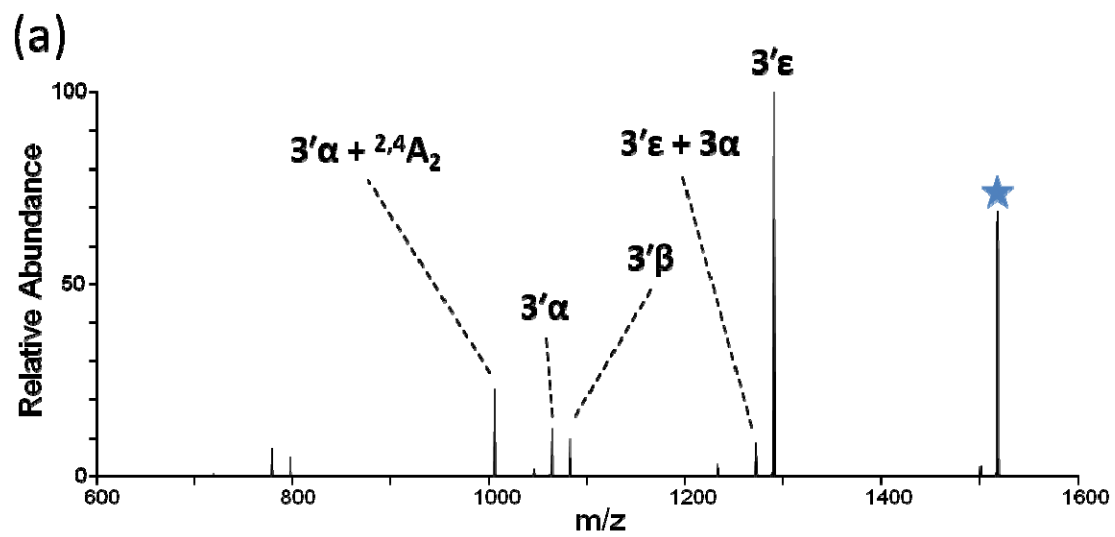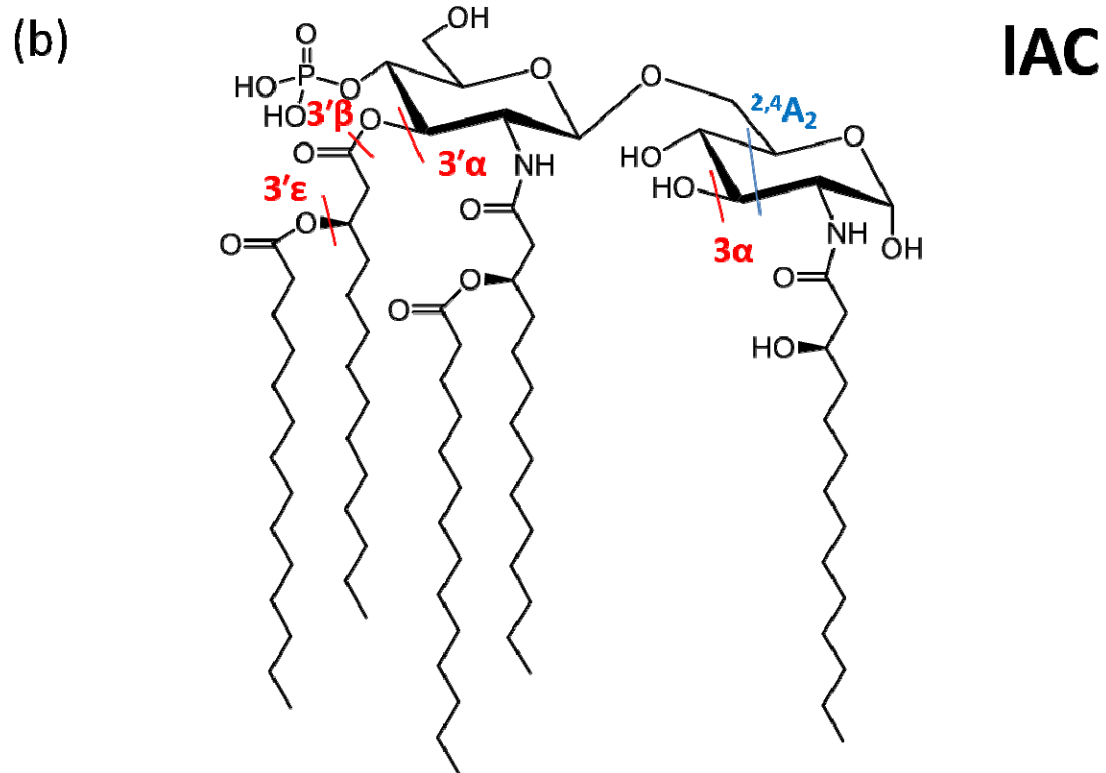

Supplementary Figure S7: MS2 HCD spectra of IAC at NCE=20. The structure of IAC is shown in (b).



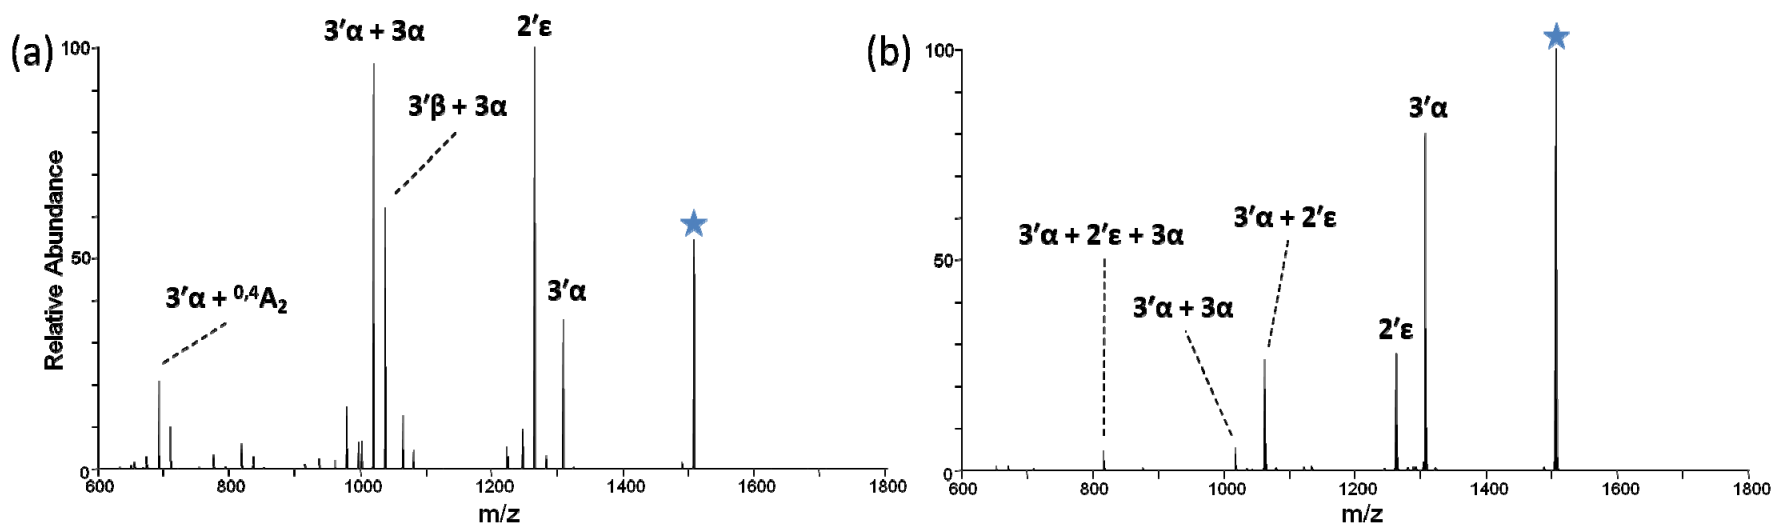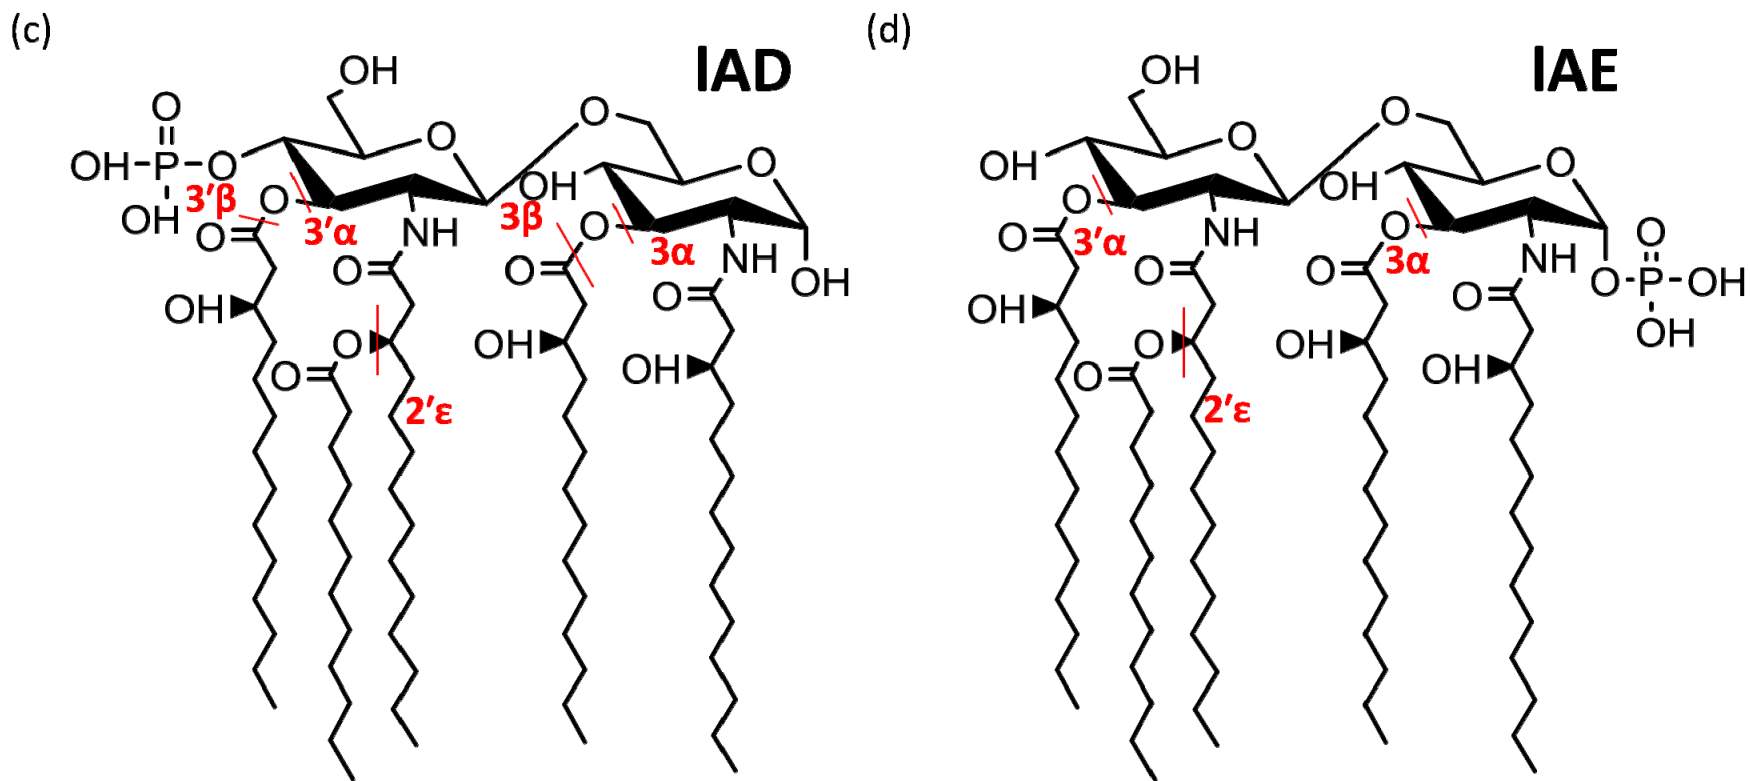

Supplementary Figure S8: MS2 HCD spectra of (a) IAD and (b) IAE at NCE=25 and their structures (c) and (d), respectively.

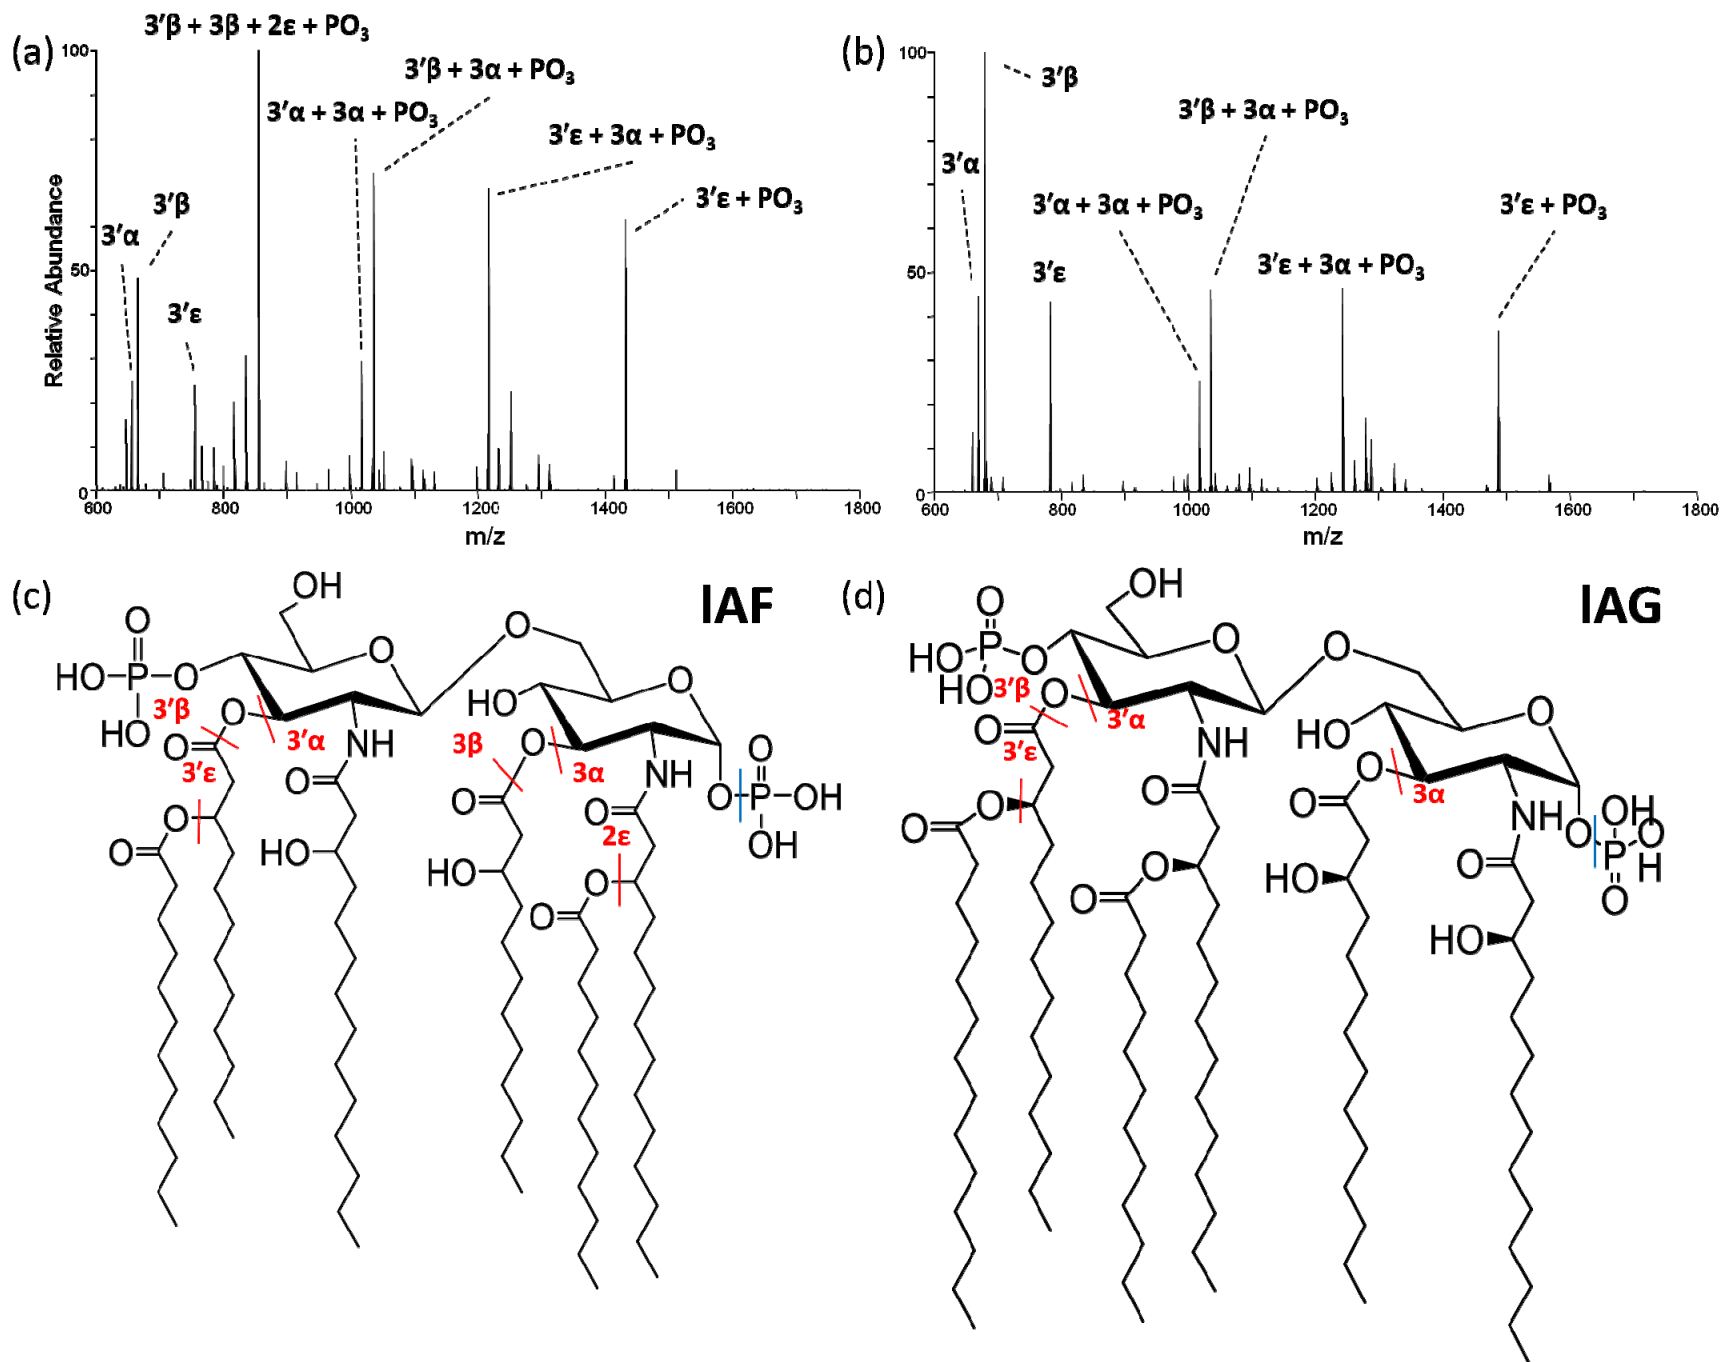

Supplementary Figure S9: MS2 HCD spectra of (a) IAF and (b) IAG at NCE=30 and their structures (c) and (d), respectively.

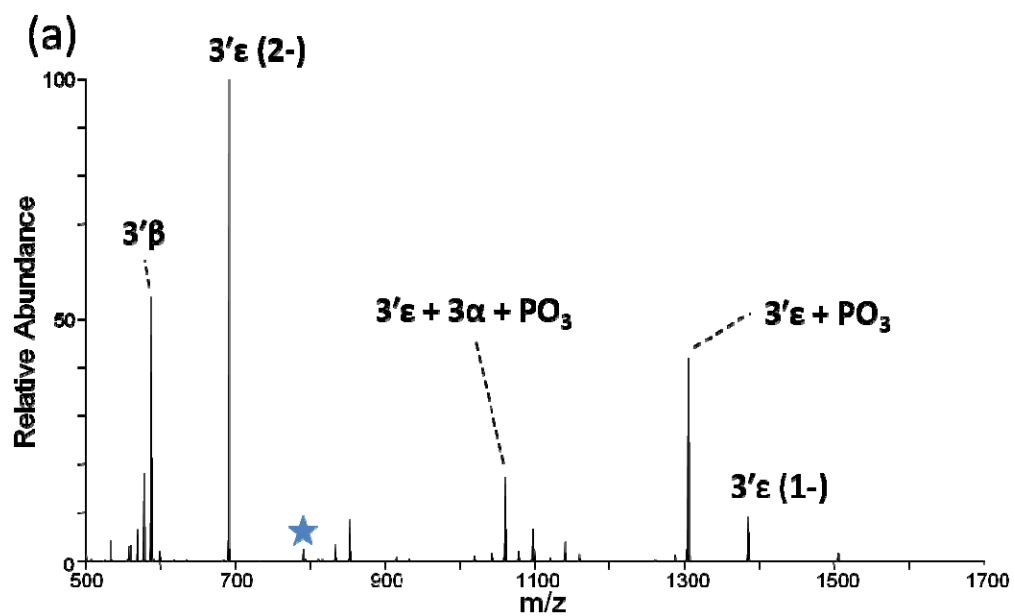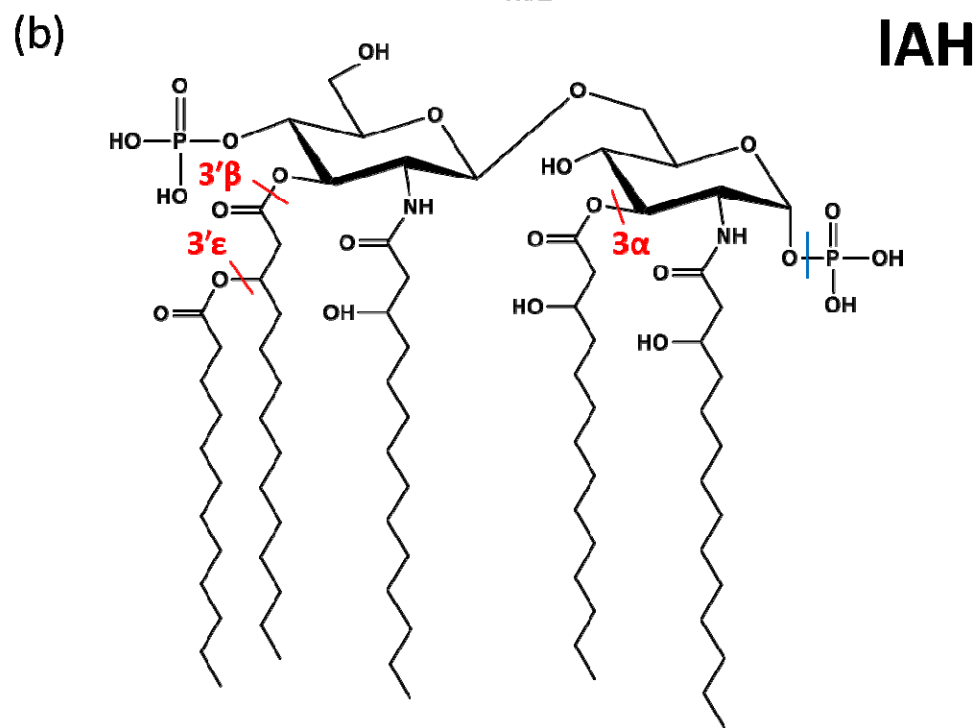

Supplementary Figure S10: IAH MS2 spectra using HCD at NCE=25 (a). The structure of IAH is shown in (b).

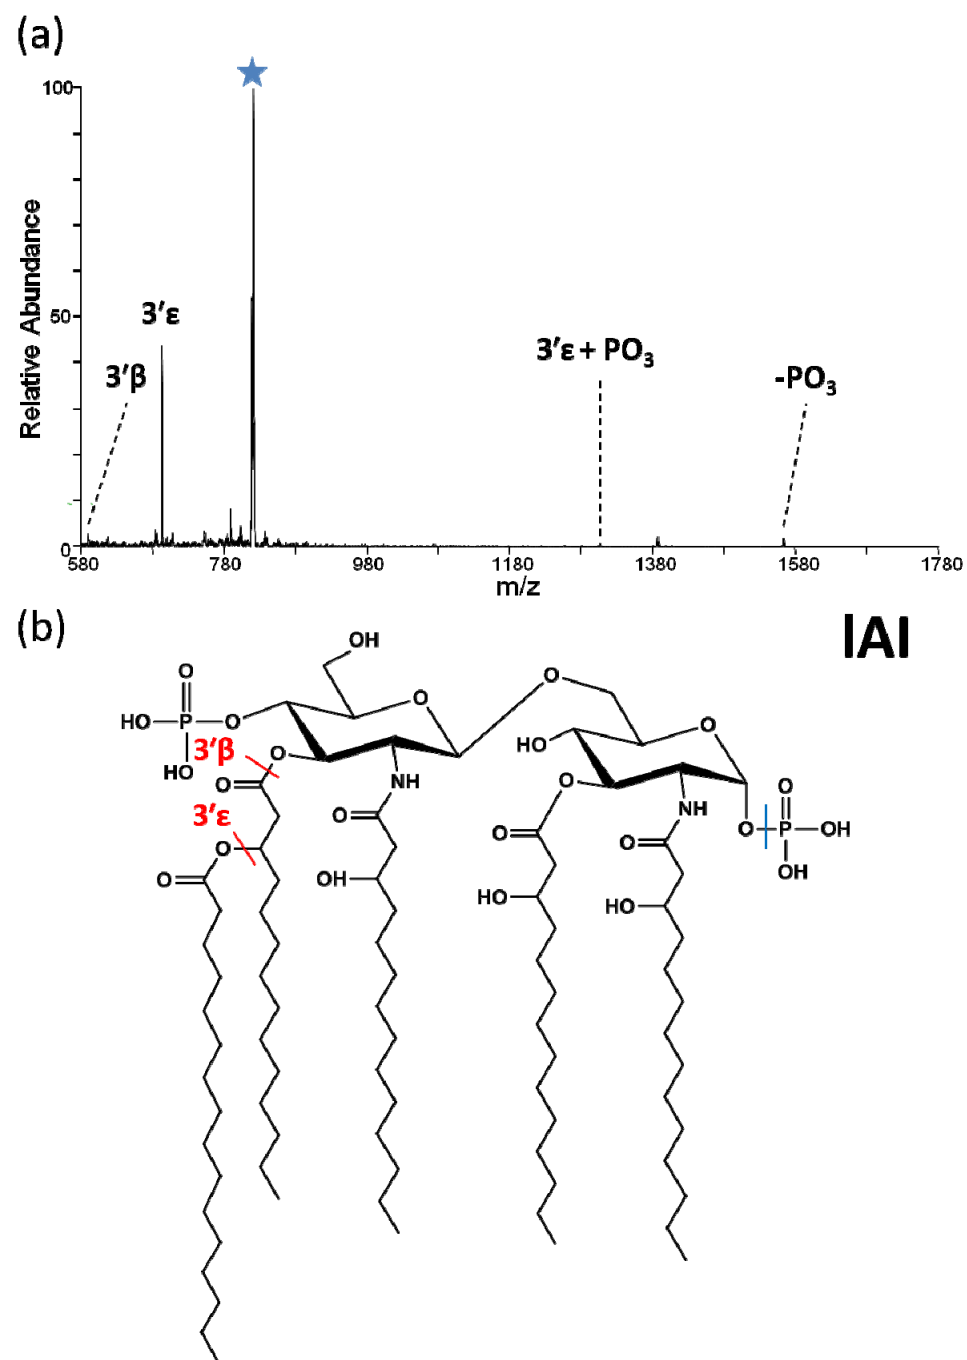

Supplementary Figure S11: lAI MS2 spectra using HCD at NCE=25 (a). The structure of lAI is shown in (b).

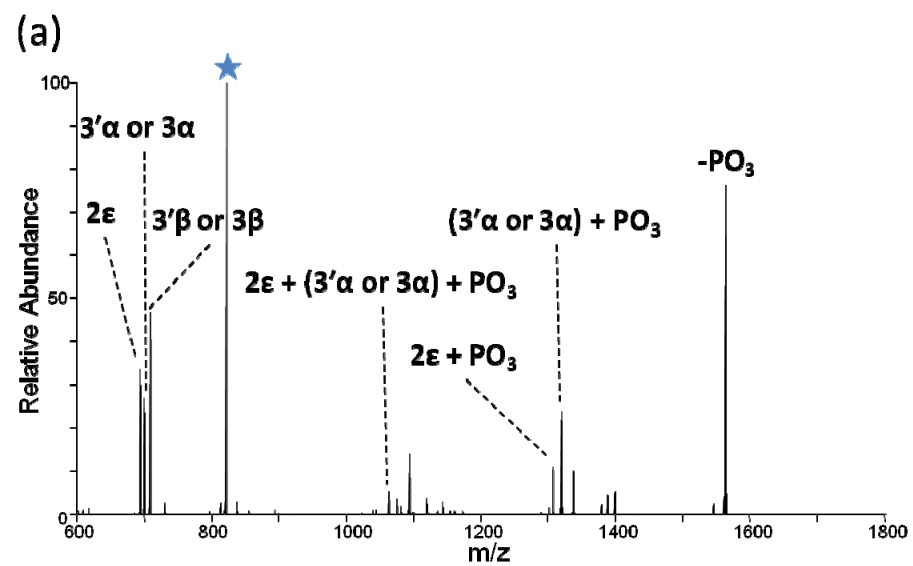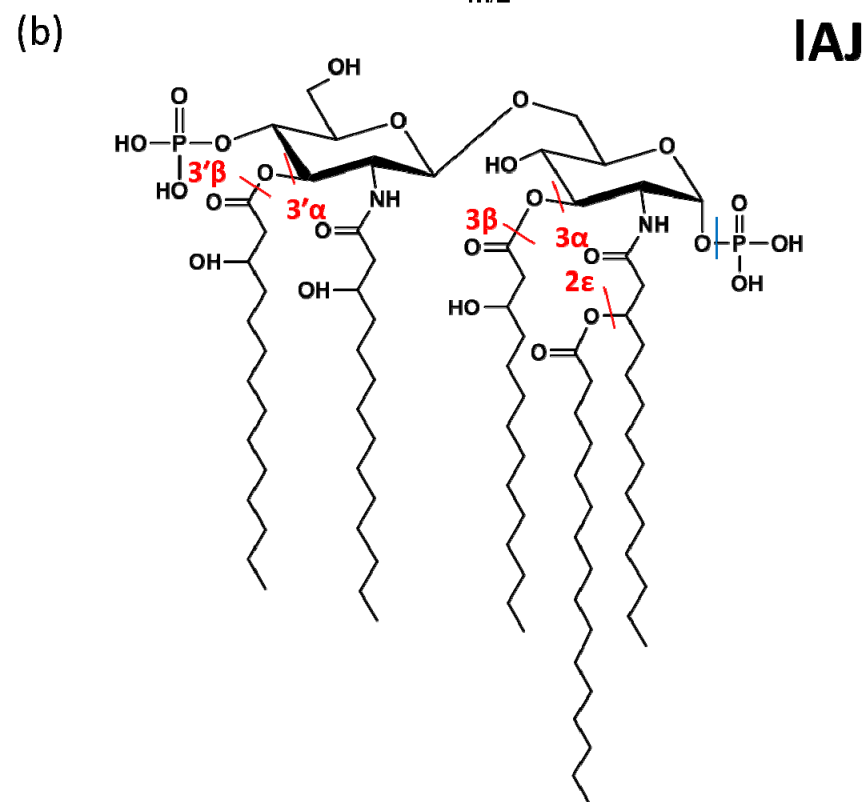

Supplementary Figure S12: IAJ MS2 spectra using HCD at NCE=25 (a). The structure of IAJ is shown in (b).

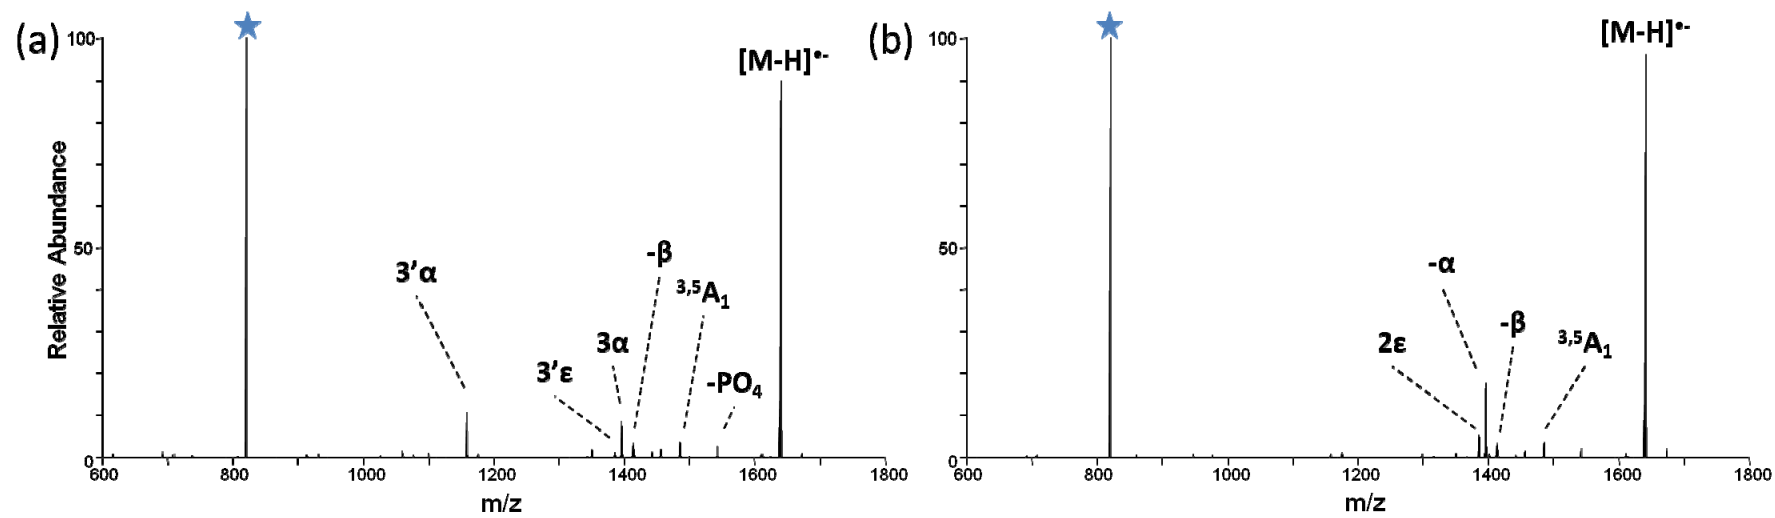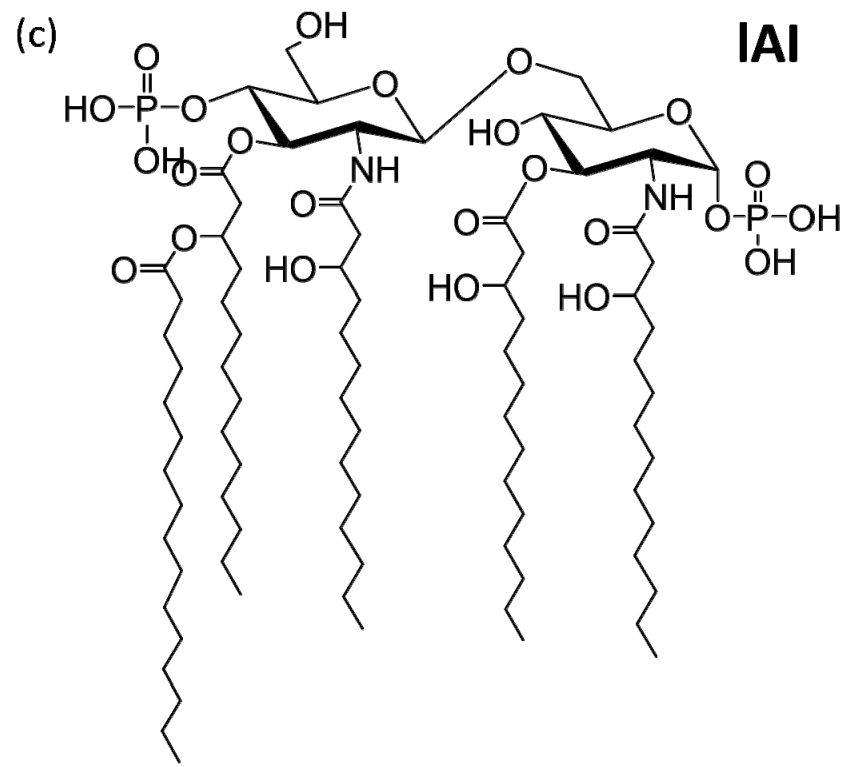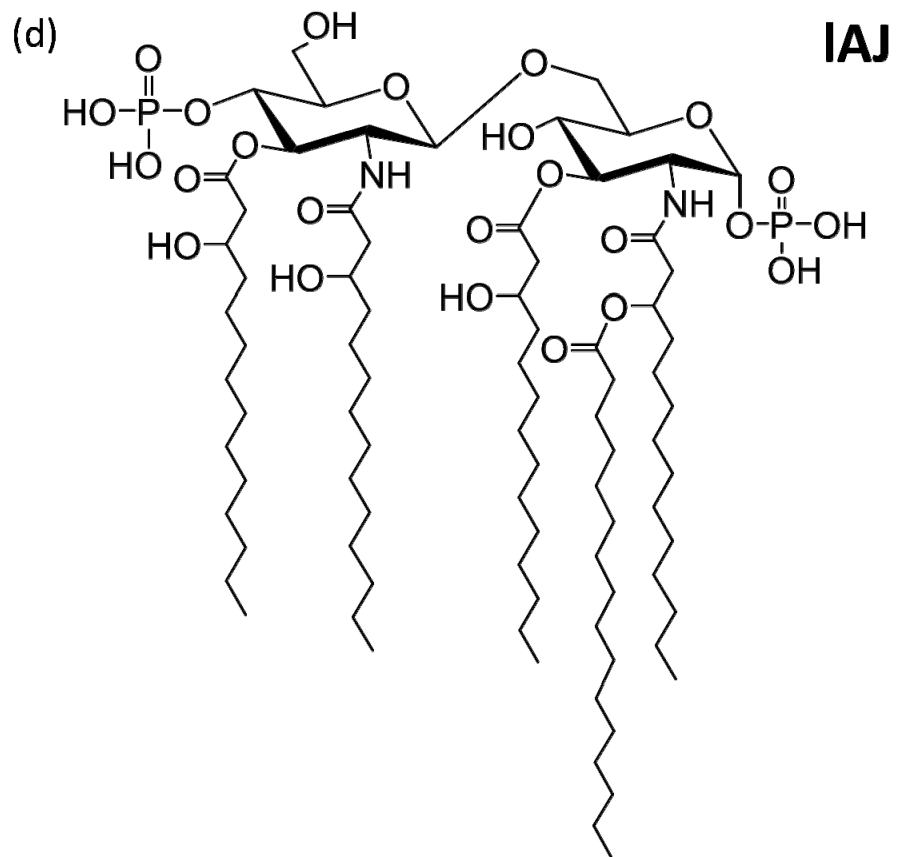

Supplementary Figure 13: MS2 UVPD spectra of (a) lAI and (b) lAJ at 3mJ and 7 pulses and their structures (c) and (d), respectively.

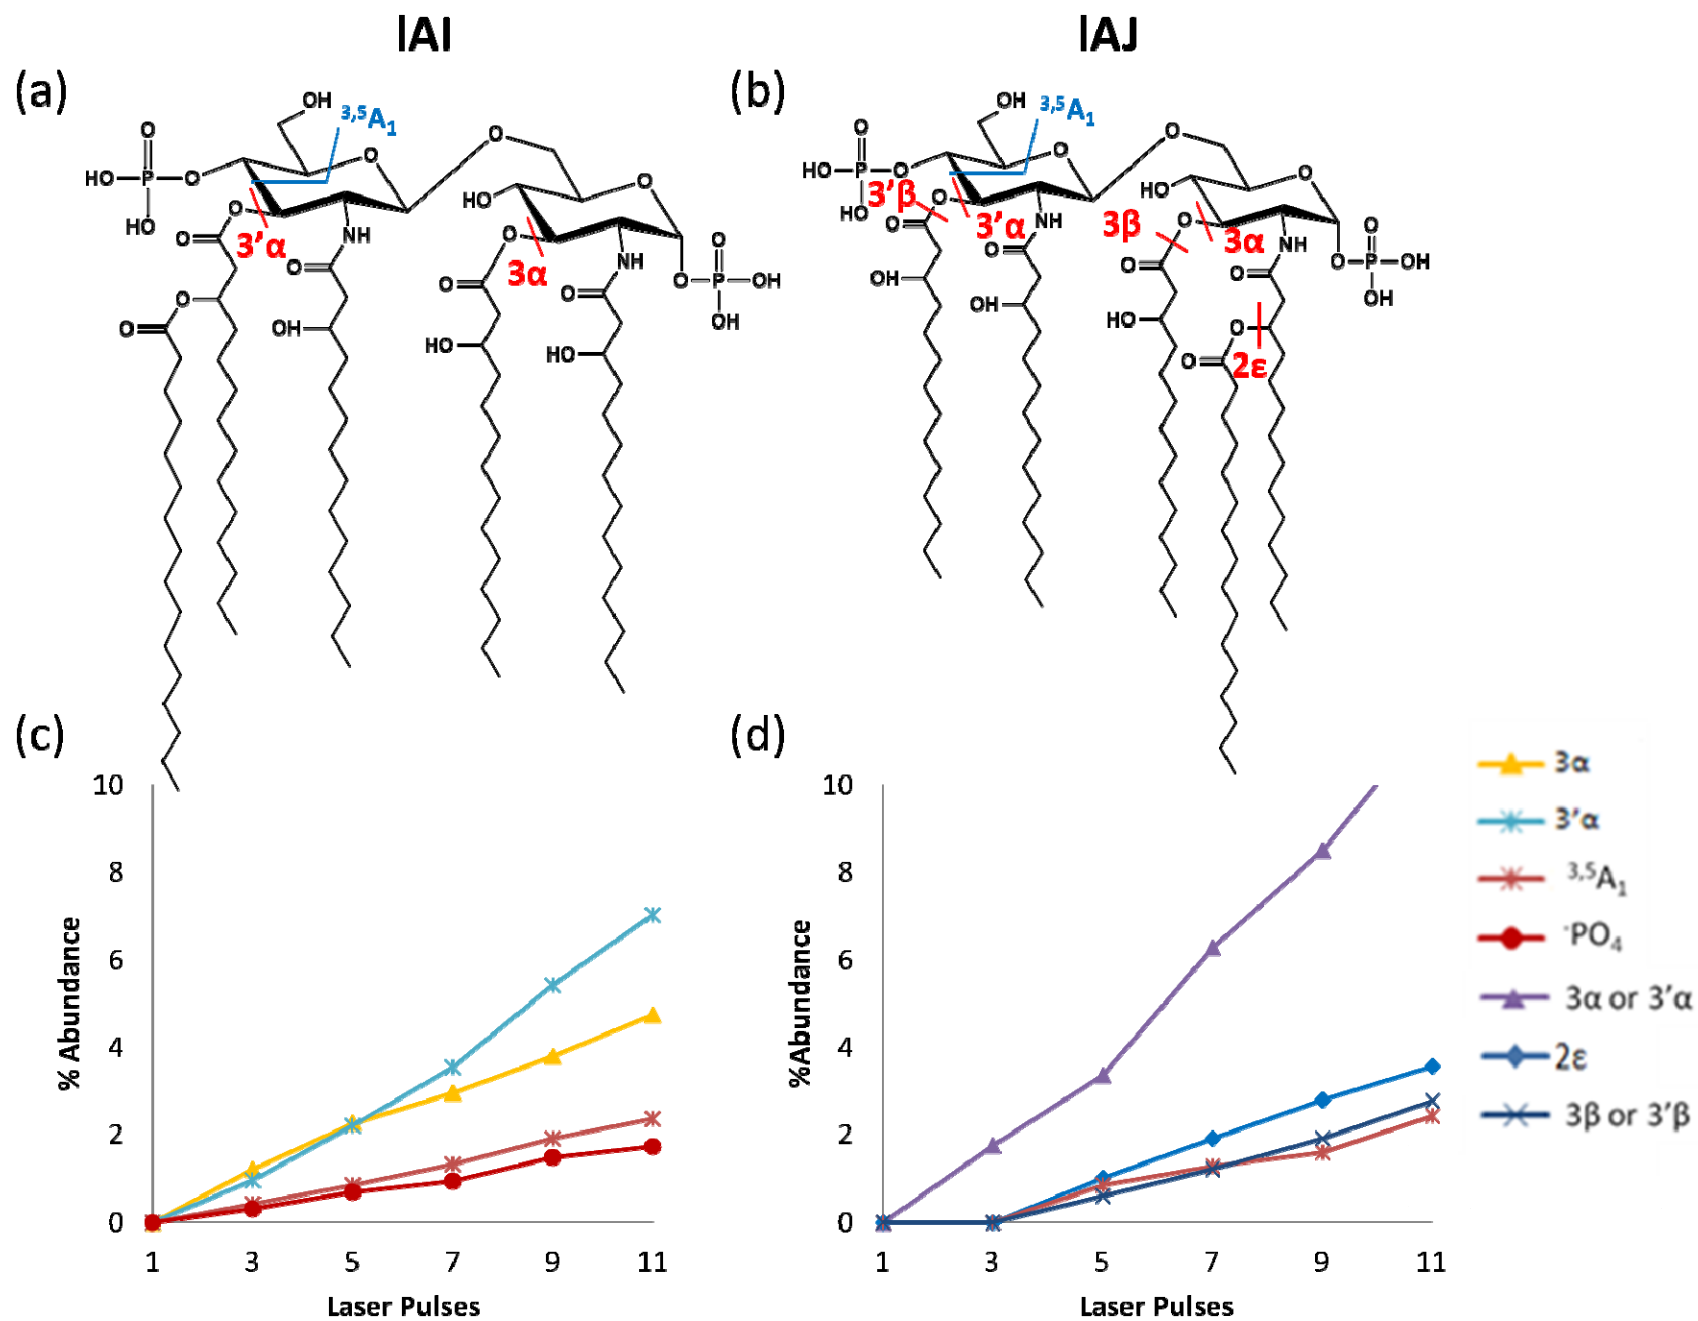

**Supplementary Figure 14:** Structures of lipid A isomers (a) IAI and (b) IAJ. The UVPD ERMS plots are shown for each doubly deprotonated lipid in (c) and (d), respectively, showing the preference for loss of α-chains over ε-chains.
